# Supplementary material for: Unusual smectic phases organized by novel λ-shaped mesogenic molecules
Source: Royal Society of Chemistry journal article supplement (doi:10.1039/b406716a), 2004-12-24
Supplement: b406716a.doc [file b406716a.doc]

Details of material preparation

4-Heptylphenyl 3,4-bis{6-[4-(5-octylpyrimidin-2-yl)phenyloxy]hexyloxy}benzoate, **1**

To a solution of 3,4-bis{6-[4-(5-octylpyrimidin-2-yl)phenyloxy]hexyloxy}benzoic acid (0.20 g, 0.23 mmol) in dicchloromethane (15 mL), 4-heptylphenol (0.043 g, 0.23 mmol), dicyclohexylcarbodiimide (0.047 g, 0.23 mmol), and 4-(*N, N*-dimethylamino)pyridine (0.003g, 0.023 mmol) were added. The resulting solution was stirred at room temperature overnight. Precipitated materials were removed by filtration. After removal of the solvent by evaporation, the residue was purified by column chromatography on silica gel using a dichloromethane-ethyl acetate (20 : 1) mixture as the eluent. Recrystallization from ethanol gave the desired product. Yield: 0.14 g (60 %).

H (270MHz, CDCl3, TMS): 8.55 (s, 4H, Ar-H), 8.34 (dd, 4H, Ar-H, J = 8.9Hz, 2.2Hz), 7.81 (dd, 1H, Ar-H, J = 8.9Hz, 2.2Hz), 7.67 (d, 1H, Ar-H, J = 2.2Hz), 7.20 (d, 2H, Ar-H, J = 8.4Hz), 7.10 (d, 2H, J = 8.6Hz) 6.98-6.91 (m, 4H, Ar-H), 4.10 (t, 2H, -OCH2-, J = 6.5Hz), 4.09 (t, 2H, -OCH2-, J = 6.5Hz), 4.03 (t, 2H, -OCH2-, J = 6.5Hz), 4.02 (t, 2H, -OCH2-, J = 6.5Hz), 2.60 (m, 6H, Ar-CH2-), 1.90-1.27 (m, 50H, aliphatic-H), 0.88 (t, 9H, -CH3, J = 6.6Hz). /cm-1(KBr): 2925, 2852 (C-H str.), 1608, 1583 (C=C str.). Purity: 100 %.

Biphenyl-4-yl 3,4-bis{6-[4-(5-octylpyrimidin-2-yl)phenyloxy]hexyloxy}benzoate, **2**

This compound was prepared from 3,4-bis{6-[4-(5-octylpyrimidin-2-yl)phenyloxy]-　hexyloxy}benzoic acid (0.20 g, 0.23 mmol) and 4-hydroxybiphenyl (0.038 g, 0.23 mmol) in a similar method to that described for compound **1**. Yield: 0.12 g (51 %).

H (270MHz, CDCl3, TMS): 8.55 (d, 4H, Ar-H), 8.34 (dd, 4H, Ar-H, J = 9.2Hz, 2.3Hz), 7.84 (dd, 1H, Ar-H, J = 8.5Hz, 2.0Hz), 7.70 (d, 1H, Ar-H, 1.9Hz), 7.61 (m, 4H, Ar-H), 7.43 (t, 2H, Ar-H, J = 7.2Hz), 7.37-7.26 (m, 2H, Ar-H), 6.99-6.93 (m, 5H, Ar-H), 4.11 (t, 2H, -OCH2-, J = 6.5Hz), 4.10 (t, 2H, -OCH2-, J = 6.5Hz), 4.03 (t, 2H, -OCH2-, J = 6.5Hz), 4.02 (t, 2H, -OCH2-, J = 6.5Hz), 2.58 (t, 4H, Ar-CH2-, J = 7.6Hz) 1.91-1.27 (m, 40H, aliphatic-H), 0.88 (t, 6H, -CH3, J = 6.8Hz). /cm-1(KBr): 2925, 2852 (C-H str.), 1608, 1583 (C=C str.). Purity: 99.9 %.

4-((*R*)-1-Methylheptyloxycarbonyl)phenyl 3,4-bis{6-[4-(5-octylpyrimidin-2-yl) phenyloxy]hexyloxy}benzoate, **3**

This compound was prepared from 3,4-bis{6-[4-(5-octylpyrimidin-2-yl)phenyloxy]-　hexyloxy}benzoic acid (0.10 g, 0.11 mmol) and 1-methylheptyl (*R*)-4-hydroxybenzoate (0.028 g, 0.11 mmol) in a similar method to that described for compound **1**. Yield: 0.070 g (56 %).

H (270MHz, CDCl3, TMS): 8.57 (s, 4H, Ar-H), 8.34 (dd, 4H, Ar-H, J = 8.5Hz, 1.9Hz), 8.10 (d, 2H, Ar-H, J = 8.6Hz), 7.82 (dd, 1H, Ar-H, J = 8.5Hz, 2.0Hz), 7.66 (d, 2H, Ar-H, J = 1.9Hz), 7.27 (d, 2H, Ar-H, J = 8.9Hz), 6.95 (m, 5H, Ar-H), 5.16 (m, 1H, -COOCH-), 4.11 (t, 2H, -OCH2-, J = 6.5Hz), 4.09 (t, 2H, -OCH2-, J = 6.5Hz), 4.03 (t, 2H, -OCH2-, J = 6.5Hz), 4.02 (t, 2H, -OCH2-, J = 6.5Hz), 2.58 (t, 4H, Ar-CH2-, J = 7.6Hz), 1.93-1.27 (m, 53H, aliphatic-H), 0.88 (t, 9H, -CH3, J = 6.6Hz). /cm-1(KBr): 2925, 2852 (C-H str.), 1608, 1583 (C=C str.). Purity: 100%.

4-((*S*)-1-Methylheptyloxycarbonyl)phenyl 3,4-bis{6-[4-(5-octylpyrimidin-2-yl) phenyloxy]hexyloxy}benzoate

This compound was prepared from 3,4-bis{6-[4-(5-octylpyrimidin-2-yl)phenyloxy]-　hexyloxy}benzoic acid (0.10 g, 0.11 mmol) and 1-methylheptyl (*S*)-4-hydroxybenzoate (0.028 g, 0.11 mmol) in a similar method to that described for compound **1**. Yield: 0.070 g (56%).

H (270MHz, CDCl3, TMS): 8.57 (s, 4H, Ar-H), 8.34 (dd, 4H, Ar-H, J = 8.5Hz, 1.9Hz), 8.10 (d, 2H, Ar-H, J = 8.6Hz), 7.82 (dd, 1H, Ar-H, J = 8.5Hz, 2.0Hz), 7.66 (d, 2H, Ar-H, J = 1.9Hz), 7.27 (d, 2H, Ar-H, J = 8.9Hz), 6.95 (m, 5H, Ar-H), 5.16 (m, 1H, -COOCH-), 4.11 (t, 2H, -OCH2-, J = 6.5Hz), 4.09 (t, 2H, -OCH2-, J = 6.5Hz), 4.03 (t, 2H, -OCH2-, J = 6.5Hz), 4.02 (t, 2H, -OCH2-, J = 6.5Hz), 2.58 (t, 4H, Ar-CH2-, J = 7.6Hz), 1.93-1.27 (m, 53H, aliphatic-H), 0.88 (t, 9H, -CH3, J = 6.6Hz). /cm-1(KBr): 2925, 2852 (C-H str.), 1608, 1583 (C=C str.). Purity: 100%.

4-(5-Octylpyrimidin-2-yl)phenyl 3,4-bis{6-[4-(5-octylpyrimidin-2-yl)phenyloxy] hexyloxy}benzoate, **5**

This compound was prepared from 3,4-bis{6-[4-(5-octylpyrimidin-2-yl)phenyloxy]-　hexyloxy}benzoic acid (0.20 g, 0.23 mmol) and 4-(5-octylpyrimidin-2-yl)phenol (0.064 g, 0.23 mmol) in a similar method to that described for compound **1**. Yield: 0.18 g (69 %).

H (270MHz, CDCl3, TMS): 8.62 (s, 2H, Ar-H), 8.55 (s, 4H, Ar-H), 8.49 (d, 2H, Ar-H, J = 8.9Hz), 8.34 (dd, 4H, Ar-H, J = 8.8Hz, 2.4Hz), 7.83 (dd, 1H, Ar-H, J = 8.6Hz, 1.9Hz), 7.69 (d, 1H, Ar-H, J = 2.2Hz), 7.33 (d, 2H, Ar-H, J = 8.9Hz), 6.98-6.92 (m, 5H, Ar-H), 4.11 (t, 2H, -OCH2-, J = 6.5Hz), 4.10 (t, 2H, -OCH2-, J = 6.5Hz), 4.03 (t, 2H, -OCH2-, J = 6.5Hz), 4.02 (t, 2H, -OCH2-, J = 6.5Hz), 2.65-2.55 (m, 6H, Ar-CH2-), 1.91-1.27 (m, 52H, aliphatic-H), 0.90-0.85 (m, 9H, -CH3). /cm-1(KBr): 2925, 2852 (C-H str.), 1608, 1583 (C=C str.). Purity: 100%.

2-(4-Octylphenyl)pyrimidin-5-yl ester 3,4-bis{6-[4-(5-octylpyrimidin-2-yl)phenyloxy] hexyloxy}benzoate, **6**

This compound was prepared from 3,4-bis{6-[4-(5-octylpyrimidin-2-yl)phenyloxy]hexyloxy}benzoic acid (0.20 g, 0.23 mmol) and 2-(4-octylphenyl)-5-hydroxypyrimidine (0.064 g, 0.23 mmol) in a similar method to that described for compound **1**. Yield: 0.24 g (92 %).

H (270MHz, CDCl3, TMS): 8.73 (s, 2H, Ar-H), 8.55 (s, 4H, Ar-H), 8.34 (dd, 6H, Ar-H, J = 8.8Hz, 1.5Hz), 7.84 (dd, 1H, Ar-H, J = 8.5Hz, 2.0Hz), 7.67 (d, 1H, Ar-H, J = 1.9Hz), 7.30 (d, 2H, Ar-H, J = 8.4Hz), 6.95 (d, 5H, Ar-H, J = 8.4Hz), 4.07 (m, 8H, -OCH2-), 2.68 (t, 2H, Ar-CH2-, J = 7.7Hz), 2.58 (t, 2H, Ar-CH2-, J = 7.8Hz), 1.94-1.27 (m, 52H, aliphatic-H), 0.88 (t, 9H, -CH3, J = 6.6Hz). /cm-1(KBr): 2925, 2852 (C-H str.), 1608, 1583 (C=C str.). Purity: 100%.

Ethyl 4-hydroxy-3-{6-[2-(4-octylphenyl)pyrimidin-5-yloxy]hexyloxy}benzoate

5-(6-Bromohexyloxy)-2-(4-octylphenyl)pyrimidine (0.45 g, 1.0 mmol) and ethyl 3,4-dihydroxybenzoate (0.91 g, 5.0 mmol) were dissolved in cyclohexanone (15 ml).　K2CO3 (0.42 g, 3.0 mmol) was then added and the resulting mixture was stirred at 70 ℃ for 8 h. The reaction mixture was filtered and the solvent was removed by evaporation under reduced pressure. The product was purified by column chromatography using a dichloromethane-ethyl acetate (29 : 1) mixture as the eluent, and then recrystallized from an ethanol-chloroform (4 : 1) mixture (5 ml). Yield: 0.17 g (30 %).

H (270MHz, CDCl3, TMS): 8.46 (s, 2H, Ar-H), 8.26 (d, 2H, Ar-H, J = 8.4Hz), 7.62-7.58 (m, 2H, Ar-H), 7.27 (d, 2H, Ar-H, J = 9.6Hz), 6.85 (d, 1H, Ar-H, J = 8.9Hz), 5.63 (s, 1H, Ar-OH), 4.34 (q, 2H, -COOCH2-, J = 7.3Hz), 4.13 (t, 2H, -OCH2-, J = 6.2Hz), 4.12 (t, 2H, -OCH2-, J = 6.2Hz), 2.66 (t, 2H, Ar-CH2-, J = 7.6Hz), 1.87-1.27 (m, 23H, aliphatic-H), 0.88 (t, 3H, -CH3, J = 6.8Hz). /cm-1(KBr): 3430 (O-H str.) 2942, 2861 (C-H str.), 1700 (C=O str. -COO-), 1601 (C=C str.).

Ethyl 3-{6-[2-(4-octylphenyl)pyrimidin-5-yloxy]hexyloxy}-4-{6-[4-(5-octylpyrimidin-2-yl) phenyloxy]hexyloxy}benzoate

Ethyl 4-hydroxy-3-{6-[2-(4-octylphenyl)pyrimidin-5-yloxy]hexyloxy}benzoate (0.15 g, 0.27 mmol) and 2-[4-(6-bromohexyloxy)phenyl]-5-octylpyrimidine (0.12 g, 0.27 mmol) were dissolved in cyclohexanone (10 ml). K2CO3 (0.037 g, 0.27 mmol) and KI (0.0045 g, 0.027 mmol) were then added and the resulting mixture was stirred at 145 ℃ for 10 h. The reaction mixture was filtered and the solvent was removed by evaporation under reduced pressure. The product was purified by column chromatography using a dichloromethane-ethyl acetate (40 : 1) mixture as the eluent, and then recrystallized from an ethanol-chloroform (4 : 1) mixture (5 ml). Yield: 0.55 g (57 %).

H (270MHz, CDCl3, TMS): 8.56 (s, 2H, Ar-H), 8.41 (s, 2H, Ar-H), 8.34 (d, 2H, Ar-H, J = 8.9Hz), 8.23 (d, 2H, Ar-H, J = 8.1Hz), 7.64 (dd, 1H, Ar-H, J = 8.6Hz, 1.9Hz), 7.55 (d, 1H, Ar-H, J = 1.9Hz), 7.26 (d, 2H, Ar-H, J = 8.4Hz), 6.96 (d, 2H, Ar-H, J = 8.9Hz), 6.87 (d, 1H, Ar-H, J = 8.1Hz), 4.34 (q, 2H, -COOCH2-, J = 7.3Hz), 4.09-4.01 (m, 8H, -OCH2-), 2.65 (t, 2H, Ar-CH2-, J = 7.6Hz), 2.58 (t, 2H, Ar-CH2-, J = 7.6Hz), 1.87-1.27 (m, 43H, aliphatic-H), 0.88 (t, 6H, -CH3, J = 6.8Hz). /cm-1(KBr): 2926, 2854 (C-H str.), 1710 (C=O str. -COO-), 1609, 1585 (C=C str.).

3-{6-[2-(4-Octylphenyl)pyrimidin-5-yloxy]hexyloxy}-4-{6-[4-(5-octylpyrimidin-2-yl) phenyloxy]hexyloxy}benzoic acid

This compound was prepared from ethyl 3-{6-[2-(4-octylphenyl)pyrimidin-5-yloxy]hexyloxy}- 4-{6-[4-(5-octylpyrimidin-2-yl)phenyloxy]hexyloxy}benzoate (0.26 g, 0.28 mmol) in a similar method to that described for 3,4-bis{6-[4-(5-octylpyrimidin-2-yl)phenyloxy]hexyloxy}benzoic acid. Yield: 0.23 g (90 %).

H (270MHz, CDCl3, TMS): 8.58 (s, 2H, Ar-H), 8.42 (s, 2H, Ar-H), 8.34 (d, 2H, Ar-H, J = 9.0Hz), 8.25 (d, 2H, Ar-H, J = 8.6Hz), 7.71 (dd, 1H, Ar-H, J = 8.4Hz, 1.9Hz), 7.58 (d, 1H, Ar-H,J = 2.2Hz), 7.26 (m, 4H, Ar-H), 6.97 (d, 2H, Ar-H, J = 9.2Hz), 6.89 (d, 1H, Ar-H, J = 8.6Hz), 4.11-4.02 (m, 8H, -OCH2-), 2.65 (t, 2H, Ar-CH2-, J = 7.3Hz), 2.59 (t, 2H, Ar-CH2-, J = 7.6Hz), 1.89-1.27 (m, 40H, aliphatic-H), 0.88 (t, 6H, -CH3, J = 6.8Hz). /cm-1(KBr): 2927, 2854 (C-H str.), 1680 (C=O str. -COOH),1607, 1585 (C=C str.).

4-(5-Octylpyrimidin-2-yl)phenyl 3-{6-[2-(4-Octylphenyl)pyrimidin-5-yloxy]hexyloxy} -4-{6-[4-(5-octylpyrimidin-2-yl)phenyloxy]hexyloxy}benzoate, **7**

This compound was prepared from 3-{6-[2-(4-octylphenyl)pyrimidin-5-yloxy]hexyloxy}-4-{6-[4-(5-octylpyrimidin-2-yl)phenyloxy]hexyloxy}benzoic acid (0.10 g, 0.11 mmol) and 4-(5-octylpyrimidin-2-yl)phenol (0.032 g, 0.10 mmol) in a similar method to that described for compound **5**. The product was purified by column chromatography using a dichloromethane-ethyl acetate (20 : 1) mixture as the eluent, and then recrystallized from an ethanol-chloroform (5 :1) mixture (3 ml). Yield: 0.054 g (42 %). Purity: 100%.

H (270MHz, CDCl3, TMS): 8.62 (s, 2H, Ar-H), 8.58 (s, 2H, Ar-H), 8.50 (d, 2H, Ar-H, J = 8.9Hz), 8.42 (s, 2H, Ar-H), 8.37 (d, 2H, Ar-H, J = 8.9Hz), 8.24 (d, 2H, Ar-H, J = 8.6Hz), 7.84 (dd, 1H, Ar-H, J = 8.6Hz, 1.9Hz), 7.70 (d, 1H, Ar-H, J = 1.9Hz), 7.33 (d, 2H, Ar-H, J = 8.9Hz), 7.26 (d, 2H, Ar-H, J = 8.1Hz), 6.99-6.92 (m, 3H, Ar-H), 4.14-4.02 (m, 8H, -OCH2-), 2.68-2.56 (m, 6H, Ar-CH2-), 1.91-1.28 (m, 52H, aliphatic-H), 0.90-0.85 (t, 9H, -CH3). /cm-1(KBr): 2922, 2853 (C-H str.), 1720 (C=O str. -COO-),1607 (C=C str.).

Ethyl 4-hydroxy-3-{6-[4-(5-octylpyrimidin-2-yl)phenyloxy]hexyloxy}benzoate

2-[4-(6-Bromohexyloxy)phenyl]-5-octylpyrimidine (0.90 g, 2.0 mmol) and ethyl 3,4-dihydroxybenzoate (1.82 g, 10.0 mmol) were dissolved in cyclohexanone (20 ml).　K2CO3 (0.83 g, 6.0 mmol) was then added and the resulting mixture was stirred at 70 ℃ for 9 h. The reaction mixture was filtered and the solvent was removed by evaporation under reduced pressure. The product was purified by column chromatography using a dichloromethane-ethyl acetate (40 : 1) mixture as the eluent, and then recrystallized from an ethanol-chloroform (4 : 1) mixture (5 ml). Yield: 0.45 g (41 %).

H (270MHz, CDCl3, TMS): 8.57 (s, 2H, Ar-H), 8.36 (d, 2H, Ar-H, J = 8.9Hz), 7.60 (d, 1H, Ar-H, Jmeta = 1.9Hz), 7.59 (dd, 1H, Ar-H, J = 8.9Hz, 2.2Hz), 6.98 (d, 4H, Ar-H, J = 8.9Hz), 6.87 (d, 1H, Ar-H, J = 8.4Hz), 5.6 (s, 1H, Ar-OH), 4.33 (q, 2H, -COOCH2-, J = 7.3Hz), 4.12 (t, 2H, -OCH2-, J =6.6Hz), 4.05 (t, 2H, -OCH2-, J =6.2Hz), 2.60 (t, 2H, Ar-CH2-, J = 7.7Hz), 1.9-1.27 (m, 23H, aliphatic-H), 0.88 (t, 3H, -CH3, J = 6.6Hz). /cm-1(KBr): 3403 (O-H str.) 2925, 2853 (C-H str.), 1694 (C=O str. -COO-), 1606, 1581 (C=C str.).

Ethyl 4-{6-[2-(4-octylphenyl)pyrimidin-5-yloxy]hexyloxy}-3-{6-[4-(5-octylpyrimidin-2-yl)phenyloxy]hexyloxy}benzoate

Ethyl 4-hydroxy-3-{6-[4-(5-octylpyrimidin-2-yl)phenyloxy]hexyloxy}benzoate (0.20 g, 0.36 mmol) and 5-(6-bromohexyloxy)-2-(4-octylphenyl)pyrimidine (0.16 g, 0.36 mmol) were dissolved in cyclohexanone (10 ml). K2CO3 (0.050 g, 0.36 mmol) and KI (0.006 g, 0.036 mmol) were then added and the resulting mixture was stirred at 145 ℃ for 10 h. The reaction mixture was filtered and the solvent was removed by evaporation under reduced pressure. The product was purified by column chromatography using a dichloromethane-ethyl acetate (29 : 1) mixture as the eluent, and then recrystallized from an ethanol-chloroform (5 : 1) mixture (6 ml). Yield: 0.25 g (75%).

H (270MHz, CDCl3, TMS): 8.55 (s, 2H, Ar-H), 8.41 (s, 2H, Ar-H), 8.34 (d, 2H, Ar-H, J = 8.9Hz), 8.23 (d, 2H, Ar-H, J = 8.1Hz), 7.64 (dd, 1H, Ar-H, J = 8.6Hz, 1.9Hz), 7.55 (d, 1H, Ar-H, J = 2.2Hz), 7.26 (m, 2H, Ar-H), 6.96 (d, 2H, Ar-H, J = 8.9Hz), 6.87 (d, 1H, Ar-H, J = 8.6Hz), 4.34 (q, 2H, -COOCH2-, J = 7.3Hz), 4.09-4.00 (m, 8H, -OCH2-), 2.65 (t, 2H, Ar-CH2-, J = 7.7Hz), 2.58 (t, 2H, Ar-CH2-, J = 7.6Hz), 1.87-1.27 (m, 43H, aliphatic-H), 0.88 (t, 6H, -CH3, J = 6.6Hz). /cm-1(KBr): 2924, 2854 (C-H str.), 1713 (C=O str. -COO-), 1607, 1587 (C=C str.).

4-{6-[2-(4-Octylphenyl)pyrimidin-5-yloxy]hexyloxy}-3-{6-[4-(5-octylpyrimidin-2-yl)- phenyloxy]hexyloxy}benzoic acid

This compound was prepared from ethyl 4-{6-[2-(4-octylphenyl)pyrimidin-5-yloxy]hexyloxy}-3-{6-[4-(5-octylpyrimidin-2-yl)phenyloxy]hexyloxy}benzoate (0.23 g, 0.25 mmol) in a similar method to that described for 3,4-bis{6-[4-(5-octylpyrimidin-2-yl)phenoxy]hexyloxy}benzoic acid. Yield: 0.21 g (93 %).

4-(5-Octylpyrimidin-2-yl)phenyl 4-{6-[2-(4-octylphenyl)pyrimidin-5-yloxy]hexyloxy}-3-{6-[4-(5-octylpyrimidin-2-yl)phenyloxy]hexyloxy}benzoate, **8**

This compound was prepared from 4-{6-[2-(4-octylphenyl)pyrimidin-5-yloxy]hexyloxy}-3-{6-[4-(5-octylpyrimidin-2-yl)phenyloxy]hexyloxy}benzoic acid (0.09 g, 0.10 mmol) and 4-(5-octylpyrimidin-2-yl)phenol (0.029 g, 0.10 mmol) in a similar method to that described for compound 5. The product was purified by column chromatography using a dichloromethane-ethyl acetate (20 : 1) mixture as the eluent, and then recrystallized from an ethanol-chloroform (5 :1) mixture (3 ml). Yield: 0.028 g (24%). Purity: 100%.

H (270MHz, CDCl3, TMS): 8.62 (s, 2H, Ar-H), 8.55 (s, 2H, Ar-H), 8.49 (d, 2H, Ar-H, J = 8.9Hz), 8.41(s, 2H, Ar-H), 8.34 (d, 4H, Ar-H, J = 8.9Hz), 8.23 (d, 2H, Ar-H, J = 8.1Hz), 7.84 (dd, 1H, Ar-H, J = 8.6Hz, 1.9Hz), 7.69 (d, 1H, Ar-H, J = 2.2Hz), 7.32 (d, 2H, Ar-H, J = 8.6Hz), 7.26 (d, 2H, Ar-H, J = 8.6Hz), 6.99-6.92 (m, 3H, Ar-H), 4.14-4.02 (m, 8H, -OCH2-), 2.68-2.55 (m, 6H, Ar-CH2-), 1.91-1.28 (m, 52H, aliphatic-H), 0.90-0.85 (t, 9H, -CH3). /cm-1(KBr): 2924, 2853 (C-H str.), 1734 (C=O str. -COO-), 1601 (C=C str.).
